# Supplementary material
Source: publisher figshare collection journal article supplement (https://springernature.figshare.com/ndownloader/files/12384071)
Supplement: Supplementary file 1 [file 12384071]

## Sheet: reptile_dat
Order	Family	Genus	Species	Subspecies	Genus_species	Sample size	Sex	Method	Body weight (g)	SVL (mm)	Brain weight (g)	Brain volume (mm3)	Age Class	Species Name in original article	Reference	Remark
Crocodilia	Alligatoridae	Alligator	mississippiensis		Alligator_mississippiensis	1	m	Mass	205000		14.08		Adult		Crile G and Quiring DP (1940) Ohio J Sci 5:219-285
Crocodilia	Alligatoridae	Alligator	mississippiensis		Alligator_mississippiensis	1	m	Mass	173000		11.2		Adult		Crile G and Quiring DP (1940) Ohio J Sci 5:219-285
Crocodilia	Crocodylidae	Crocodylus	acutus		Crocodylus_acutus	1	f	Mass	134000		15.6		Adult		Crile G and Quiring DP (1940) Ohio J Sci 5:219-285	Cat.nm:183
Crocodilia	Crocodylidae	Crocodylus	acutus		Crocodylus_acutus	1	unknown	Mass	110000		11		Adult		Specter WS (1956) Handbook of Biological Data
Squamata	Agamidae	Agama	agama		Agama_agama	1	unknown	Mass	29.3		0.173		Adult		Platel R (1975) Z. Zool. Syst. Evolutionsforsh. 13:161-184
Squamata	Agamidae	Agama	inermis		Trapelus_mutabilis	1	unknown	Mass	12.9		0.099		Adult		Platel R (1975) Z. Zool. Syst. Evolutionsforsh. 13:161-184
Squamata	Agamidae	Calotes	versicolor		Calotes_versicolor	1	unknown	Mass	14.6		0.097		Adult		Platel R (1975) Z. Zool. Syst. Evolutionsforsh. 13:161-184
Squamata	Agamidae	Uromastyx	acanthinurus		Uromastyx_acanthinura	1	unknown	Mass	164		0.335		Adult		Platel R (1975) Z. Zool. Syst. Evolutionsforsh. 13:161-184
Squamata	Anguidae	Anguis	fragilis		Anguis_fragilis	1	unknown	Mass	16.252		0.039		unknown		Dubois E (1913) On the relation between the quantity of brain and the size of the body in vertebrates
Squamata	Anguidae	Anguis	fragilis		Anguis_fragilis	1	unknown	Mass	18.9		0.037		unknown		Dubois E (1913) On the relation between the quantity of brain and the size of the body in vertebrates
Squamata	Anguidae	Anguis	fragilis		Anguis_fragilis	1	unknown	Mass	22		0.044		Adult		Platel R (1975) Z. Zool. Syst. Evolutionsforsh. 13:161-184
Squamata	Boidae	Boa	constrictor		Boa_constrictor	1	unknown	Mass	1829		0.44		Adult		Crile G and Quiring DP (1940) Ohio J Sci 5:219-285
Squamata	Boidae	Boa	constrictor		Boa_constrictor	1	unknown	Mass	4460		0.649		Adult		Platel R (1975) Z. Zool. Syst. Evolutionsforsh. 13:161-184
Squamata	Chamaeleonidae	Chamaeleo	lateralis		Furcifer_lateralis	1	unknown	Mass	10.9		0.061		Adult		Platel R (1975) Z. Zool. Syst. Evolutionsforsh. 13:161-184
Squamata	Colubridae	Coluber	constrictor		Coluber_constrictor	1	f	Mass	590		0.271		Adult		Crile G and Quiring DP (1940) Ohio J Sci 5:219-285
Squamata	Colubridae	Coluber	constrictor		Coluber_constrictor	1	m	Mass	286		0.303		Adult		Crile G and Quiring DP (1940) Ohio J Sci 5:219-285
Squamata	Colubridae	Coluber	constrictor		Coluber_constrictor	1	m	Mass	417		0.299		Adult		Crile G and Quiring DP (1940) Ohio J Sci 5:219-285
Squamata	Colubridae	Coluber	viridiflavus		Hierophis_viridiflavus	1	unknown	Mass	285.1		0.209		Adult		Platel R (1975) Z. Zool. Syst. Evolutionsforsh. 13:161-184
Squamata	Colubridae	Coronella	girondica		Coronella_girondica	1	unknown	Mass	117		0.088		Adult		Platel R (1975) Z. Zool. Syst. Evolutionsforsh. 13:161-184
Squamata	Colubridae	Elaphe	longissima		Zamenis_longissimus	1	unknown	Mass	148.2		0.168		Adult		Platel R (1975) Z. Zool. Syst. Evolutionsforsh. 13:161-184
Squamata	Colubridae	Natrix	maura		Natrix_maura	1	unknown	Mass	86		0.095		Adult		Platel R (1975) Z. Zool. Syst. Evolutionsforsh. 13:161-184
Squamata	Colubridae	Natrix	natrix		Natrix_natrix	20	both	Mass	70		0.1		Adult	Tropidonotus natrix	Crile G and Quiring DP (1940) Ohio J Sci 5:219-285
Squamata	Colubridae	Natrix	natrix		Natrix_natrix	1	unknown	Mass	74.1		0.115		Adult		Platel R (1975) Z. Zool. Syst. Evolutionsforsh. 13:161-184
Squamata	Colubridae	Thamnophis	sirtalis		Thamnophis_sirtalis	1	f	Mass	52		0.077		Adult		Crile G and Quiring DP (1940) Ohio J Sci 5:219-285
Squamata	Colubridae	Thamnophis	sirtalis		Thamnophis_sirtalis	1	f	Mass	57		0.123		Adult		Crile G and Quiring DP (1940) Ohio J Sci 5:219-285
Squamata	Colubridae	Zamenis	lineatus		Zamenis_lineatus	6	both	Mass	220		0.209		Adult		Crile G and Quiring DP (1940) Ohio J Sci 5:219-285
Squamata	Cordylidae	Cordylus	cordylus		Cordylus_cordylus	1	unknown	Mass	56.5		0.175		Adult		Platel R (1975) Z. Zool. Syst. Evolutionsforsh. 13:161-184
Squamata	Dactyloidae	Anolis	auratus		Anolis_auratus	1	unknown	Mass	10.5		0.073		Adult		Platel R (1975) Z. Zool. Syst. Evolutionsforsh. 13:161-184
Squamata	Dactyloidae	Anolis	cristatellus		Anolis_cristatellus	10	unknown	Vol	9.56	66.23	0.0980875	0.0946791	Adult		Powell BJ and Leal M (2012) Brain Behav. Evol. 80:170-180
Squamata	Dactyloidae	Anolis	evermanni		Anolis_evermanni	10	unknown	Vol	4.95	58.86	0.0725691	0.0700474	Adult		Powell BJ and Leal M (2012) Brain Behav. Evol. 80:170-180
Squamata	Dactyloidae	Anolis	gundlachi		Anolis_gundlachi	10	unknown	Vol	6.29	62.22	0.0908276	0.0876714	Adult		Powell BJ and Leal M (2012) Brain Behav. Evol. 80:170-180
Squamata	Dactyloidae	Anolis	krugi		Anolis_krugi	10	unknown	Vol	2.43	46.1	0.0501088	0.0483676	Adult		Powell BJ and Leal M (2012) Brain Behav. Evol. 80:170-180
Squamata	Dactyloidae	Anolis	pulchellus		Anolis_pulchellus	8	unknown	Vol	1.86	43.62	0.0410071	0.0395821	Adult		Powell BJ and Leal M (2012) Brain Behav. Evol. 80:170-180
Squamata	Dactyloidae	Anolis	stratulus		Anolis_stratulus	10	unknown	Vol	2.19	45.36	0.0710199	0.068552	Adult		Powell BJ and Leal M (2012) Brain Behav. Evol. 80:170-180
Squamata	Elapidae	Naja	melanoleuca		Naja_melanoleuca	1	unknown	Mass	1770		0.646		Adult		Dubois E (1913) On the relation between the quantity of brain and the size of the body in vertebrates
Squamata	Gekkonidae	Gekko	gecko		Gekko_gecko	1	unknown	Mass	54.8		0.198		Adult		Platel R (1975) Z. Zool. Syst. Evolutionsforsh. 13:161-184
Squamata	Gekkonidae	Hemidactylus	brookii		Hemidactylus_brookii	4	unknown	Mass	4.7		0.043		unknown		Dubois E (1913) On the relation between the quantity of brain and the size of the body in vertebrates
Squamata	Gekkonidae	Hemidactylus	mabouia		Hemidactylus_mabouia	1	unknown	Mass	2.5		0.033		Adult		Platel R (1975) Z. Zool. Syst. Evolutionsforsh. 13:161-184
Squamata	Gekkonidae	Phelsuma	cepediana		Phelsuma_cepediana	1	unknown	Mass	5		0.059		Adult		Platel R (1975) Z. Zool. Syst. Evolutionsforsh. 13:161-184
Squamata	Gekkoninae	Tarentola	mauritanica		Tarentola_mauritanica	1	unknown	Mass	7.8		0.07		Adult		Platel R (1975) Z. Zool. Syst. Evolutionsforsh. 13:161-184
Squamata	Gerrhosauridae	Zonosaurus	maximus		Zonosaurus_maximus	1	unknown	Mass	386.4		0.565		Adult		Platel R (1975) Z. Zool. Syst. Evolutionsforsh. 13:161-184
Squamata	Gerrhosauridae	Zonosaurus	quadrilineatus		Zonosaurus_quadrilineatus	1	unknown	Mass	82.7		0.209		Adult		Platel R (1975) Z. Zool. Syst. Evolutionsforsh. 13:161-184
Squamata	Iguanidae	Amblyrhynchus	cristatus		Amblyrhynchus_cristatus	1	unknown	Mass	4190		1.44		Adult		Crile G and Quiring DP (1940) Ohio J Sci 5:219-285
Squamata	Iguanidae	Iguana	iguana		Iguana_iguana	1	unknown	Mass	253.5		0.606		Adult		Platel R (1975) Z. Zool. Syst. Evolutionsforsh. 13:161-184
Squamata	Iguanidae	Liolaemus	chiliensis		Liolaemus_chiliensis	1	unknown	Mass	26		0.1035		Adult		Platel R (1975) Z. Zool. Syst. Evolutionsforsh. 13:161-184
Squamata	Lacertidae	Lacerta	agilis		Lacerta_agilis	2	unknown	Mass	12.057		0.076		unknown		Dubois E (1913) On the relation between the quantity of brain and the size of the body in vertebrates
Squamata	Lacertidae	Lacerta	lepida		Timon_lepidus	1	unknown	Mass	70.8		0.224		Adult		Platel R (1975) Z. Zool. Syst. Evolutionsforsh. 13:161-184
Squamata	Lacertidae	Lacerta	muralis		Podarcis_muralis	1	unknown	Mass	4.2		0.046		Adult		Platel R (1975) Z. Zool. Syst. Evolutionsforsh. 13:161-184
Squamata	Lacertidae	Lacerta	viridis		Lacerta_viridis	1	unknown	Mass	26		0.134		Adult		Crile G and Quiring DP (1940) Ohio J Sci 5:219-285
Squamata	Lacertidae	Lacerta	viridis		Lacerta_viridis	1	unknown	Mass	16.8		0.093		unknown		Dubois E (1913) On the relation between the quantity of brain and the size of the body in vertebrates
Squamata	Lacertidae	Lacerta	viridis		Lacerta_viridis	1	unknown	Mass	21.2		0.109		Adult		Platel R (1975) Z. Zool. Syst. Evolutionsforsh. 13:161-184
Squamata	Lacertidae	Lacerta	vivipara		Zootoca_vivipara	1	unknown	Mass	3.2		0.028		Adult		Platel R (1975) Z. Zool. Syst. Evolutionsforsh. 13:161-184
Squamata	Lacertidae	Psammodromus	algirus		Psammodromus_algirus	1	unknown	Mass	4.3		0.045		Adult		Platel R (1975) Z. Zool. Syst. Evolutionsforsh. 13:161-184
Squamata	Lacertidae	Psammodromus	hispanicus		Psammodromus_hispanicus	1	unknown	Mass	2.1		0.025		Adult		Platel R (1975) Z. Zool. Syst. Evolutionsforsh. 13:161-184
Squamata	Opluridae	Chalarodon	madagascariensis		Chalarodon_madagascariensis	1	unknown	Mass	6.3		0.06		Adult		Platel R (1975) Z. Zool. Syst. Evolutionsforsh. 13:161-184
Squamata	Opluridae	Oplurus	cuvieri		Oplurus_cuvieri	1	unknown	Mass	51		0.267		Adult	Hoplurus sebae	Platel R (1975) Z. Zool. Syst. Evolutionsforsh. 13:161-184
Squamata	Phrynosomatidae	Phrynosoma	coronatum		Phrynosoma_coronatum	3	f	Mass	24.9		0.1269		Adult		Crile G and Quiring DP (1940) Ohio J Sci 5:219-285	Arizona
Squamata	Phrynosomatidae	Phrynosoma	coronatum		Phrynosoma_coronatum	2	m	Mass	25		0.1383		Adult		Crile G and Quiring DP (1940) Ohio J Sci 5:219-285	Arizona
Squamata	Pythonidae	Python	molurus		Python_molurus	1	unknown	Mass	6140		1.123		Adult		Crile G and Quiring DP (1940) Ohio J Sci 5:219-285
Squamata	Scincidae	Carlia	bicarinata		Carlia_bicarinata	1	f	Mass	1.48	42	0.019		Adult		Black DG (1983) Encephalization of Australian lizards. Unpublished MSc thesis, Monash University, Clayton, Australia.
Squamata	Scincidae	Carlia	bicarinata		Carlia_bicarinata	1	f	Mass	1.24	41	0.0194		Adult		Black DG (1983) Encephalization of Australian lizards. Unpublished MSc thesis, Monash University, Clayton, Australia.
Squamata	Scincidae	Carlia	bicarinata		Carlia_bicarinata	1	f	Mass	1.12	40	0.0167		Adult		Black DG (1983) Encephalization of Australian lizards. Unpublished MSc thesis, Monash University, Clayton, Australia.
Squamata	Scincidae	Carlia	bicarinata		Carlia_bicarinata	1	f	Mass	1.28	38	0.0171		Adult		Black DG (1983) Encephalization of Australian lizards. Unpublished MSc thesis, Monash University, Clayton, Australia.
Squamata	Scincidae	Carlia	bicarinata		Carlia_bicarinata	1	m	Mass	2.32	46	0.0304		Adult		Black DG (1983) Encephalization of Australian lizards. Unpublished MSc thesis, Monash University, Clayton, Australia.
Squamata	Scincidae	Carlia	bicarinata		Carlia_bicarinata	1	m	Mass	2.08	45	0.023		Adult		Black DG (1983) Encephalization of Australian lizards. Unpublished MSc thesis, Monash University, Clayton, Australia.
Squamata	Scincidae	Carlia	bicarinata		Carlia_bicarinata	1	m	Mass	2.28	43	0.022		Adult		Black DG (1983) Encephalization of Australian lizards. Unpublished MSc thesis, Monash University, Clayton, Australia.
Squamata	Scincidae	Carlia	bicarinata		Carlia_bicarinata	1	m	Mass	1.93	43	0.0028		Adult		Black DG (1983) Encephalization of Australian lizards. Unpublished MSc thesis, Monash University, Clayton, Australia.
Squamata	Scincidae	Carlia	bicarinata		Carlia_bicarinata	1	m	Mass	1.76	42	0.0228		Adult		Black DG (1983) Encephalization of Australian lizards. Unpublished MSc thesis, Monash University, Clayton, Australia.
Squamata	Scincidae	Carlia	bicarinata		Carlia_bicarinata	1	m	Mass	1.7	41	0.0241		Adult		Black DG (1983) Encephalization of Australian lizards. Unpublished MSc thesis, Monash University, Clayton, Australia.
Squamata	Scincidae	Carlia	bicarinata		Carlia_bicarinata	1	m	Mass	1.12	39	0.0204		Adult		Black DG (1983) Encephalization of Australian lizards. Unpublished MSc thesis, Monash University, Clayton, Australia.
Squamata	Scincidae	Carlia	bicarinata		Carlia_bicarinata	1	m	Mass	1.18	37	0.0174		Adult		Black DG (1983) Encephalization of Australian lizards. Unpublished MSc thesis, Monash University, Clayton, Australia.
Squamata	Scincidae	Carlia	bicarinata		Carlia_bicarinata	1	m	Mass	1.18	36	0.0175		Adult		Black DG (1983) Encephalization of Australian lizards. Unpublished MSc thesis, Monash University, Clayton, Australia.
Squamata	Scincidae	Carlia	bicarinata		Carlia_bicarinata	1	m	Mass	1.14	36	0.0184		Adult		Black DG (1983) Encephalization of Australian lizards. Unpublished MSc thesis, Monash University, Clayton, Australia.
Squamata	Scincidae	Chalcides	chalcides		Chalcides_chalcides	1	unknown	Mass	18.8		0.0555		Adult		Platel R (1975) Z. Zool. Syst. Evolutionsforsh. 13:161-184
Squamata	Scincidae	Chalcides	mionecton		Chalcides_mionecton	1	unknown	Mass	6.4		0.03		Adult		Platel R (1975) Z. Zool. Syst. Evolutionsforsh. 13:161-184
Squamata	Scincidae	Chalcides	ocellatus		Chalcides_ocellatus	1	unknown	Mass	32		0.09		Adult		Platel R (1975) Z. Zool. Syst. Evolutionsforsh. 13:161-184
Squamata	Scincidae	Cryptoblepharus	virgatus		Cryptoblepharus_virgatus	1	f	Mass	1.01	45	0.0143		Adult		Black DG (1983) Encephalization of Australian lizards. Unpublished MSc thesis, Monash University, Clayton, Australia.
Squamata	Scincidae	Cryptoblepharus	virgatus		Cryptoblepharus_virgatus	1	f	Mass	0.89	42	0.012		Adult		Black DG (1983) Encephalization of Australian lizards. Unpublished MSc thesis, Monash University, Clayton, Australia.
Squamata	Scincidae	Cryptoblepharus	virgatus		Cryptoblepharus_virgatus	1	f	Mass	0.95	40	0.0115		Adult		Black DG (1983) Encephalization of Australian lizards. Unpublished MSc thesis, Monash University, Clayton, Australia.
Squamata	Scincidae	Cryptoblepharus	virgatus		Cryptoblepharus_virgatus	1	f	Mass	0.88	40	0.0116		Adult		Black DG (1983) Encephalization of Australian lizards. Unpublished MSc thesis, Monash University, Clayton, Australia.
Squamata	Scincidae	Cryptoblepharus	virgatus		Cryptoblepharus_virgatus	1	f	Mass	0.86	40	0.0123		Adult		Black DG (1983) Encephalization of Australian lizards. Unpublished MSc thesis, Monash University, Clayton, Australia.
Squamata	Scincidae	Cryptoblepharus	virgatus		Cryptoblepharus_virgatus	1	f	Mass	0.8	38.5	0.0102		Adult		Black DG (1983) Encephalization of Australian lizards. Unpublished MSc thesis, Monash University, Clayton, Australia.
Squamata	Scincidae	Cryptoblepharus	virgatus		Cryptoblepharus_virgatus	1	f	Mass	0.58	34	0.0096		Adult		Black DG (1983) Encephalization of Australian lizards. Unpublished MSc thesis, Monash University, Clayton, Australia.
Squamata	Scincidae	Cryptoblepharus	virgatus		Cryptoblepharus_virgatus	1	m	Mass	0.94	41	0.0116		Adult		Black DG (1983) Encephalization of Australian lizards. Unpublished MSc thesis, Monash University, Clayton, Australia.
Squamata	Scincidae	Cryptoblepharus	virgatus		Cryptoblepharus_virgatus	1	m	Mass	0.99	40	0.0116		Adult		Black DG (1983) Encephalization of Australian lizards. Unpublished MSc thesis, Monash University, Clayton, Australia.
Squamata	Scincidae	Cryptoblepharus	virgatus		Cryptoblepharus_virgatus	1	m	Mass	0.88	39	0.0114		Adult		Black DG (1983) Encephalization of Australian lizards. Unpublished MSc thesis, Monash University, Clayton, Australia.
Squamata	Scincidae	Cryptoblepharus	virgatus		Cryptoblepharus_virgatus	1	m	Mass	0.91	38	0.0129		Adult		Black DG (1983) Encephalization of Australian lizards. Unpublished MSc thesis, Monash University, Clayton, Australia.
Squamata	Scincidae	Cryptoblepharus	virgatus		Cryptoblepharus_virgatus	1	m	Mass	0.65	38	0.0105		Adult		Black DG (1983) Encephalization of Australian lizards. Unpublished MSc thesis, Monash University, Clayton, Australia.
Squamata	Scincidae	Cryptoblepharus	virgatus		Cryptoblepharus_virgatus	1	m	Mass	0.8	37	0.0109		Adult		Black DG (1983) Encephalization of Australian lizards. Unpublished MSc thesis, Monash University, Clayton, Australia.
Squamata	Scincidae	Cryptoblepharus	virgatus		Cryptoblepharus_virgatus	1	m	Mass	0.8	37	0.0116		Adult		Black DG (1983) Encephalization of Australian lizards. Unpublished MSc thesis, Monash University, Clayton, Australia.
Squamata	Scincidae	Cryptoblepharus	virgatus		Cryptoblepharus_virgatus	1	m	Mass	0.68	37	0.0103		Adult		Black DG (1983) Encephalization of Australian lizards. Unpublished MSc thesis, Monash University, Clayton, Australia.
Squamata	Scincidae	Cryptoblepharus	virgatus		Cryptoblepharus_virgatus	1	m	Mass	0.67	37	0.012		Adult		Black DG (1983) Encephalization of Australian lizards. Unpublished MSc thesis, Monash University, Clayton, Australia.
Squamata	Scincidae	Cryptoblepharus	virgatus		Cryptoblepharus_virgatus	1	m	Mass	0.62	37	0.0096		Adult		Black DG (1983) Encephalization of Australian lizards. Unpublished MSc thesis, Monash University, Clayton, Australia.
Squamata	Scincidae	Cryptoblepharus	virgatus		Cryptoblepharus_virgatus	1	m	Mass	0.64	34	0.0097		Adult		Black DG (1983) Encephalization of Australian lizards. Unpublished MSc thesis, Monash University, Clayton, Australia.
Squamata	Scincidae	Cyrtodactylus	sp.		Cyrtodactylus_sp.	1	f	Mass	2.48	50	0.0286		Adult		Black DG (1983) Encephalization of Australian lizards. Unpublished MSc thesis, Monash University, Clayton, Australia.
Squamata	Scincidae	Cyrtodactylus	sp.		Cyrtodactylus_sp.	1	f	Mass	1.98	44	0.021		Adult		Black DG (1983) Encephalization of Australian lizards. Unpublished MSc thesis, Monash University, Clayton, Australia.
Squamata	Scincidae	Cyrtodactylus	sp.		Cyrtodactylus_sp.	1	f	Mass	1.55	42	0.0209		Adult		Black DG (1983) Encephalization of Australian lizards. Unpublished MSc thesis, Monash University, Clayton, Australia.
Squamata	Scincidae	Cyrtodactylus	sp.		Cyrtodactylus_sp.	1	f	Mass	1.34	38	0.0145		Adult		Black DG (1983) Encephalization of Australian lizards. Unpublished MSc thesis, Monash University, Clayton, Australia.
Squamata	Scincidae	Cyrtodactylus	sp.		Cyrtodactylus_sp.	1	m	Mass	2.03	45	0.0242		Adult		Black DG (1983) Encephalization of Australian lizards. Unpublished MSc thesis, Monash University, Clayton, Australia.
Squamata	Scincidae	Cyrtodactylus	sp.		Cyrtodactylus_sp.	1	m	Mass	2.12	44	0.023		Adult		Black DG (1983) Encephalization of Australian lizards. Unpublished MSc thesis, Monash University, Clayton, Australia.
Squamata	Scincidae	Emoia	pallidiceps		Emoia_pallidiceps	1	f	Mass	2.81	55	0.037		Adult		Black DG (1983) Encephalization of Australian lizards. Unpublished MSc thesis, Monash University, Clayton, Australia.
Squamata	Scincidae	Emoia	pallidiceps		Emoia_pallidiceps	1	f	Mass	2.64	51	0.0268		Adult		Black DG (1983) Encephalization of Australian lizards. Unpublished MSc thesis, Monash University, Clayton, Australia.
Squamata	Scincidae	Emoia	pallidiceps		Emoia_pallidiceps	1	f	Mass	2.23	49	0.0262		Adult		Black DG (1983) Encephalization of Australian lizards. Unpublished MSc thesis, Monash University, Clayton, Australia.
Squamata	Scincidae	Emoia	pallidiceps		Emoia_pallidiceps	1	m	Mass	4.86	57	0.0446		Adult		Black DG (1983) Encephalization of Australian lizards. Unpublished MSc thesis, Monash University, Clayton, Australia.
Squamata	Scincidae	Emoia	pallidiceps		Emoia_pallidiceps	1	m	Mass	4.15	57	0.0428		Adult		Black DG (1983) Encephalization of Australian lizards. Unpublished MSc thesis, Monash University, Clayton, Australia.
Squamata	Scincidae	Emoia	pallidiceps		Emoia_pallidiceps	1	m	Mass	3.66	54	0.0379		Adult		Black DG (1983) Encephalization of Australian lizards. Unpublished MSc thesis, Monash University, Clayton, Australia.
Squamata	Scincidae	Emoia	pallidiceps		Emoia_pallidiceps	1	m	Mass	3.27	51	0.0369		Adult		Black DG (1983) Encephalization of Australian lizards. Unpublished MSc thesis, Monash University, Clayton, Australia.
Squamata	Scincidae	Emoia	pallidiceps		Emoia_pallidiceps	1	m	Mass	2.39	49	0.028		Adult		Black DG (1983) Encephalization of Australian lizards. Unpublished MSc thesis, Monash University, Clayton, Australia.
Squamata	Scincidae	Emoia	pallidiceps		Emoia_pallidiceps	1	m	Mass	2.4	48	0.0281		Adult		Black DG (1983) Encephalization of Australian lizards. Unpublished MSc thesis, Monash University, Clayton, Australia.
Squamata	Scincidae	Emoia	pallidiceps		Emoia_pallidiceps	1	m	Mass	2.08	46	0.0308		Adult		Black DG (1983) Encephalization of Australian lizards. Unpublished MSc thesis, Monash University, Clayton, Australia.
Squamata	Scincidae	Eumeces	schneideri		Eumeces_schneideri	1	unknown	Mass	51.7		0.1715		Adult	Eumeces schneiderii	Platel R (1975) Z. Zool. Syst. Evolutionsforsh. 13:161-184
Squamata	Scincidae	Hemidactylus	frenatus		Hemidactylus_frenatus	1	f	Mass	3.83	52	0.0289		Adult		Black DG (1983) Encephalization of Australian lizards. Unpublished MSc thesis, Monash University, Clayton, Australia.
Squamata	Scincidae	Hemidactylus	frenatus		Hemidactylus_frenatus	1	f	Mass	3.2	50	0.0294		Adult		Black DG (1983) Encephalization of Australian lizards. Unpublished MSc thesis, Monash University, Clayton, Australia.
Squamata	Scincidae	Hemidactylus	frenatus		Hemidactylus_frenatus	1	f	Mass	3.41	49	0.0289		Adult		Black DG (1983) Encephalization of Australian lizards. Unpublished MSc thesis, Monash University, Clayton, Australia.
Squamata	Scincidae	Hemidactylus	frenatus		Hemidactylus_frenatus	1	f	Mass	2.46	48	0.0263		Adult		Black DG (1983) Encephalization of Australian lizards. Unpublished MSc thesis, Monash University, Clayton, Australia.
Squamata	Scincidae	Hemidactylus	frenatus		Hemidactylus_frenatus	1	f	Mass	2.42	46	0.0248		Adult		Black DG (1983) Encephalization of Australian lizards. Unpublished MSc thesis, Monash University, Clayton, Australia.
Squamata	Scincidae	Hemidactylus	frenatus		Hemidactylus_frenatus	1	f	Mass	2.15	46	0.0257		Adult		Black DG (1983) Encephalization of Australian lizards. Unpublished MSc thesis, Monash University, Clayton, Australia.
Squamata	Scincidae	Hemidactylus	frenatus		Hemidactylus_frenatus	1	f	Mass	2.11	46	0.0234		Adult		Black DG (1983) Encephalization of Australian lizards. Unpublished MSc thesis, Monash University, Clayton, Australia.
Squamata	Scincidae	Hemidactylus	frenatus		Hemidactylus_frenatus	1	f	Mass	1.99	46	0.0242		Adult		Black DG (1983) Encephalization of Australian lizards. Unpublished MSc thesis, Monash University, Clayton, Australia.
Squamata	Scincidae	Hemidactylus	frenatus		Hemidactylus_frenatus	1	f	Mass	2.35	45	0.028		Adult		Black DG (1983) Encephalization of Australian lizards. Unpublished MSc thesis, Monash University, Clayton, Australia.
Squamata	Scincidae	Hemidactylus	frenatus		Hemidactylus_frenatus	1	f	Mass	2.18	44	0.0235		Adult		Black DG (1983) Encephalization of Australian lizards. Unpublished MSc thesis, Monash University, Clayton, Australia.
Squamata	Scincidae	Hemidactylus	frenatus		Hemidactylus_frenatus	1	f	Mass	1.19	38	0.0204		Adult		Black DG (1983) Encephalization of Australian lizards. Unpublished MSc thesis, Monash University, Clayton, Australia.
Squamata	Scincidae	Hemidactylus	frenatus		Hemidactylus_frenatus	1	m	Mass	5	59	0.0373		Adult		Black DG (1983) Encephalization of Australian lizards. Unpublished MSc thesis, Monash University, Clayton, Australia.
Squamata	Scincidae	Hemidactylus	frenatus		Hemidactylus_frenatus	1	m	Mass	4.84	59	0.0387		Adult		Black DG (1983) Encephalization of Australian lizards. Unpublished MSc thesis, Monash University, Clayton, Australia.
Squamata	Scincidae	Hemidactylus	frenatus		Hemidactylus_frenatus	1	m	Mass	4.74	56	0.0422		Adult		Black DG (1983) Encephalization of Australian lizards. Unpublished MSc thesis, Monash University, Clayton, Australia.
Squamata	Scincidae	Hemidactylus	frenatus		Hemidactylus_frenatus	1	m	Mass	4.47	56	0.0361		Adult		Black DG (1983) Encephalization of Australian lizards. Unpublished MSc thesis, Monash University, Clayton, Australia.
Squamata	Scincidae	Hemidactylus	frenatus		Hemidactylus_frenatus	1	m	Mass	4.28	56	0.037		Adult		Black DG (1983) Encephalization of Australian lizards. Unpublished MSc thesis, Monash University, Clayton, Australia.
Squamata	Scincidae	Hemidactylus	frenatus		Hemidactylus_frenatus	1	m	Mass	3.09	49	0.0332		Adult		Black DG (1983) Encephalization of Australian lizards. Unpublished MSc thesis, Monash University, Clayton, Australia.
Squamata	Scincidae	Hemidactylus	frenatus		Hemidactylus_frenatus	1	m	Mass	3.02	49	0.0303		Adult		Black DG (1983) Encephalization of Australian lizards. Unpublished MSc thesis, Monash University, Clayton, Australia.
Squamata	Scincidae	Hemidactylus	frenatus		Hemidactylus_frenatus	1	m	Mass	2.76	49	0.0286		Adult		Black DG (1983) Encephalization of Australian lizards. Unpublished MSc thesis, Monash University, Clayton, Australia.
Squamata	Scincidae	Hemidactylus	frenatus		Hemidactylus_frenatus	1	m	Mass	2.85	47	0.0282		Adult		Black DG (1983) Encephalization of Australian lizards. Unpublished MSc thesis, Monash University, Clayton, Australia.
Squamata	Scincidae	Hemidactylus	frenatus		Hemidactylus_frenatus	1	m	Mass	2.22	46	0.0276		Adult		Black DG (1983) Encephalization of Australian lizards. Unpublished MSc thesis, Monash University, Clayton, Australia.
Squamata	Scincidae	Hemidactylus	frenatus		Hemidactylus_frenatus	1	m	Mass	1.67	42	0.0221		Adult		Black DG (1983) Encephalization of Australian lizards. Unpublished MSc thesis, Monash University, Clayton, Australia.
Squamata	Scincidae	Hemidactylus	frenatus		Hemidactylus_frenatus	1	m	Mass	1.59	40	0.0174		Adult		Black DG (1983) Encephalization of Australian lizards. Unpublished MSc thesis, Monash University, Clayton, Australia.
Squamata	Scincidae	Hemidactylus	frenatus		Hemidactylus_frenatus	1	m	Mass	1.41	40	0.0199		Adult		Black DG (1983) Encephalization of Australian lizards. Unpublished MSc thesis, Monash University, Clayton, Australia.
Squamata	Scincidae	Lepidodactylus	orientalis		Lepidodactylus_orientalis	1	f	Mass	1.49	44	0.0172		Adult		Black DG (1983) Encephalization of Australian lizards. Unpublished MSc thesis, Monash University, Clayton, Australia.
Squamata	Scincidae	Lepidodactylus	orientalis		Lepidodactylus_orientalis	1	f	Mass	1.27	43	0.0156		Adult		Black DG (1983) Encephalization of Australian lizards. Unpublished MSc thesis, Monash University, Clayton, Australia.
Squamata	Scincidae	Lepidodactylus	orientalis		Lepidodactylus_orientalis	1	f	Mass	1.47	41	0.017		Adult		Black DG (1983) Encephalization of Australian lizards. Unpublished MSc thesis, Monash University, Clayton, Australia.
Squamata	Scincidae	Lepidodactylus	orientalis		Lepidodactylus_orientalis	1	f	Mass	1.14	41	0.013		Adult		Black DG (1983) Encephalization of Australian lizards. Unpublished MSc thesis, Monash University, Clayton, Australia.
Squamata	Scincidae	Lepidodactylus	orientalis		Lepidodactylus_orientalis	1	f	Mass	1.1	38	0.0133		Adult		Black DG (1983) Encephalization of Australian lizards. Unpublished MSc thesis, Monash University, Clayton, Australia.
Squamata	Scincidae	Lepidodactylus	orientalis		Lepidodactylus_orientalis	1	f	Mass	1.01	35	0.014		Adult		Black DG (1983) Encephalization of Australian lizards. Unpublished MSc thesis, Monash University, Clayton, Australia.
Squamata	Scincidae	Lepidodactylus	orientalis		Lepidodactylus_orientalis	1	m	Mass	1.4	43	0.0192		Adult		Black DG (1983) Encephalization of Australian lizards. Unpublished MSc thesis, Monash University, Clayton, Australia.
Squamata	Scincidae	Lepidodactylus	orientalis		Lepidodactylus_orientalis	1	m	Mass	1.17	41	0.0152		Adult		Black DG (1983) Encephalization of Australian lizards. Unpublished MSc thesis, Monash University, Clayton, Australia.
Squamata	Scincidae	Lepidodactylus	orientalis		Lepidodactylus_orientalis	1	m	Mass	1.05	40	0.0145		Adult		Black DG (1983) Encephalization of Australian lizards. Unpublished MSc thesis, Monash University, Clayton, Australia.
Squamata	Scincidae	Lepidodactylus	orientalis		Lepidodactylus_orientalis	1	m	Mass	1.34	39	0.0148		Adult		Black DG (1983) Encephalization of Australian lizards. Unpublished MSc thesis, Monash University, Clayton, Australia.
Squamata	Scincidae	Lepidodactylus	orientalis		Lepidodactylus_orientalis	1	m	Mass	1.23	39	0.016		Adult		Black DG (1983) Encephalization of Australian lizards. Unpublished MSc thesis, Monash University, Clayton, Australia.
Squamata	Scincidae	Lepidodactylus	orientalis		Lepidodactylus_orientalis	1	m	Mass	0.89	39	0.0137		Adult		Black DG (1983) Encephalization of Australian lizards. Unpublished MSc thesis, Monash University, Clayton, Australia.
Squamata	Scincidae	Lepidodactylus	orientalis		Lepidodactylus_orientalis	1	m	Mass	1.06	37	0.0133		Adult		Black DG (1983) Encephalization of Australian lizards. Unpublished MSc thesis, Monash University, Clayton, Australia.
Squamata	Scincidae	Lophognathus	temporalis		Lophognathus_temporalis	1	f	Mass	31.1	99	0.1395		Adult		Black DG (1983) Encephalization of Australian lizards. Unpublished MSc thesis, Monash University, Clayton, Australia.
Squamata	Scincidae	Lophognathus	temporalis		Lophognathus_temporalis	1	m	Mass	48.5	115	0.1708		Adult		Black DG (1983) Encephalization of Australian lizards. Unpublished MSc thesis, Monash University, Clayton, Australia.
Squamata	Scincidae	Lophognathus	temporalis		Lophognathus_temporalis	1	m	Mass	31.9	106	0.1573		Adult		Black DG (1983) Encephalization of Australian lizards. Unpublished MSc thesis, Monash University, Clayton, Australia.
Squamata	Scincidae	Lophognathus	temporalis		Lophognathus_temporalis	1	m	Mass	27	100	0.1493		Adult		Black DG (1983) Encephalization of Australian lizards. Unpublished MSc thesis, Monash University, Clayton, Australia.
Squamata	Scincidae	Lophognathus	temporalis		Lophognathus_temporalis	1	m	Mass	30.1	98	0.1281		Adult		Black DG (1983) Encephalization of Australian lizards. Unpublished MSc thesis, Monash University, Clayton, Australia.
Squamata	Scincidae	Scincus	scincus		Scincus_scincus	1	unknown	Mass	34.1		0.116		Adult		Platel R (1975) Z. Zool. Syst. Evolutionsforsh. 13:161-184
Squamata	Scincidae	Sphenomorphus	fragilis		Sphenomorphus_fragilis	1	f	Mass	1.21	43	0.0103		Adult		Black DG (1983) Encephalization of Australian lizards. Unpublished MSc thesis, Monash University, Clayton, Australia.
Squamata	Scincidae	Sphenomorphus	fragilis		Sphenomorphus_fragilis	1	f	Mass	0.94	43	0.009		Adult		Black DG (1983) Encephalization of Australian lizards. Unpublished MSc thesis, Monash University, Clayton, Australia.
Squamata	Scincidae	Sphenomorphus	fragilis		Sphenomorphus_fragilis	1	f	Mass	0.84	42	0.0104		Adult		Black DG (1983) Encephalization of Australian lizards. Unpublished MSc thesis, Monash University, Clayton, Australia.
Squamata	Scincidae	Sphenomorphus	fragilis		Sphenomorphus_fragilis	1	f	Mass	1.3	40	0.0101		Adult		Black DG (1983) Encephalization of Australian lizards. Unpublished MSc thesis, Monash University, Clayton, Australia.
Squamata	Scincidae	Sphenomorphus	fragilis		Sphenomorphus_fragilis	1	f	Mass	0.94	40	0.0077		Adult		Black DG (1983) Encephalization of Australian lizards. Unpublished MSc thesis, Monash University, Clayton, Australia.
Squamata	Scincidae	Sphenomorphus	fragilis		Sphenomorphus_fragilis	1	f	Mass	0.94	40	0.0088		Adult		Black DG (1983) Encephalization of Australian lizards. Unpublished MSc thesis, Monash University, Clayton, Australia.
Squamata	Scincidae	Sphenomorphus	fragilis		Sphenomorphus_fragilis	1	f	Mass	1.21	37	0.0086		Adult		Black DG (1983) Encephalization of Australian lizards. Unpublished MSc thesis, Monash University, Clayton, Australia.
Squamata	Scincidae	Sphenomorphus	fragilis		Sphenomorphus_fragilis	1	f	Mass	0.82	37	0.01		Adult		Black DG (1983) Encephalization of Australian lizards. Unpublished MSc thesis, Monash University, Clayton, Australia.
Squamata	Scincidae	Sphenomorphus	fragilis		Sphenomorphus_fragilis	1	m	Mass	1.47	46	0.0122		Adult		Black DG (1983) Encephalization of Australian lizards. Unpublished MSc thesis, Monash University, Clayton, Australia.
Squamata	Scincidae	Sphenomorphus	fragilis		Sphenomorphus_fragilis	1	m	Mass	1.34	45	0.0109		Adult		Black DG (1983) Encephalization of Australian lizards. Unpublished MSc thesis, Monash University, Clayton, Australia.
Squamata	Scincidae	Sphenomorphus	fragilis		Sphenomorphus_fragilis	1	m	Mass	1.34	44	0.0137		Adult		Black DG (1983) Encephalization of Australian lizards. Unpublished MSc thesis, Monash University, Clayton, Australia.
Squamata	Scincidae	Sphenomorphus	fragilis		Sphenomorphus_fragilis	1	m	Mass	1.26	41	0.0107		Adult		Black DG (1983) Encephalization of Australian lizards. Unpublished MSc thesis, Monash University, Clayton, Australia.
Squamata	Scincidae	Sphenomorphus	fragilis		Sphenomorphus_fragilis	1	m	Mass	1.47	40	0.0102		Adult		Black DG (1983) Encephalization of Australian lizards. Unpublished MSc thesis, Monash University, Clayton, Australia.
Squamata	Scincidae	Sphenomorphus	fragilis		Sphenomorphus_fragilis	1	m	Mass	1.29	39	0.0103		Adult		Black DG (1983) Encephalization of Australian lizards. Unpublished MSc thesis, Monash University, Clayton, Australia.
Squamata	Scincidae	Sphenomorphus	fragilis		Sphenomorphus_fragilis	1	m	Mass	1.13	39	0.0101		Adult		Black DG (1983) Encephalization of Australian lizards. Unpublished MSc thesis, Monash University, Clayton, Australia.
Squamata	Scincidae	Sphenomorphus	fragilis		Sphenomorphus_fragilis	1	m	Mass	1.09	38	0.0095		Adult		Black DG (1983) Encephalization of Australian lizards. Unpublished MSc thesis, Monash University, Clayton, Australia.
Squamata	Scincidae	Sphenomorphus	fragilis		Sphenomorphus_fragilis	1	m	Mass	0.88	37	0.0107		Adult		Black DG (1983) Encephalization of Australian lizards. Unpublished MSc thesis, Monash University, Clayton, Australia.
Squamata	Teiidae	Ameiva	sp.		Ameiva_sp.	1	unknown	Mass	27.1		0.231		Adult		Platel R (1975) Z. Zool. Syst. Evolutionsforsh. 13:161-184
Squamata	Teiidae	Callopistes	maculatus		Callopistes_maculatus	1	unknown	Mass	50.3		0.318		Adult		Platel R (1975) Z. Zool. Syst. Evolutionsforsh. 13:161-184
Squamata	Trogonophidae	Trogonophis	wiegmanni		Trogonophis_wiegmanni	1	unknown	Mass	6.5		0.021		Adult		Platel R (1975) Z. Zool. Syst. Evolutionsforsh. 13:161-184
Squamata	Varanidae	Varanus	griseus		Varanus_griseus	1	unknown	Mass	254.2		0.722		Adult		Platel R (1975) Z. Zool. Syst. Evolutionsforsh. 13:161-184
Squamata	Varanidae	Varanus	niloticus		Varanus_niloticus	1	unknown	Mass	7500		2.44		unknown		Dubois E (1913) On the relation between the quantity of brain and the size of the body in vertebrates
Squamata	Viperidae	Agkistrodon	piscivorus		Agkistrodon_piscivorus	1	unknown	Mass	728		0.64		Adult		Crile G and Quiring DP (1940) Ohio J Sci 5:219-285
Squamata	Viperidae	Cerastes	vipera		Cerastes_vipera	1	unknown	Mass	62.1		0.076		Adult		Platel R (1975) Z. Zool. Syst. Evolutionsforsh. 13:161-184
Squamata	Viperidae	Vipera	aspis		Vipera_aspis	1	unknown	Mass	68.7		0.1015		Adult		Platel R (1975) Z. Zool. Syst. Evolutionsforsh. 13:161-184
Squamata	Viperidae	Vipera	berus		Vipera_berus	7	unknown	Mass	64.2		0.105		Adult		Dubois E (1913) On the relation between the quantity of brain and the size of the body in vertebrates
Testudines	Cheloniidae	Caretta	caretta		Caretta_caretta	1	unknown	Mass	5443		2.7		Adult		Crisp E (1855) Proc. Zool. Soc. Lond. 23
Testudines	Cheloniidae	Chelonia	mydas		Chelonia_mydas	1	f	Mass	114300		8.6		Adult		Crile G and Quiring DP (1940) Ohio J Sci 5:219-285
Testudines	Chelydridae	Chelydra	serpentina		Chelydra_serpentina	1	f	Mass	5125		0.98		Adult		Crile G and Quiring DP (1940) Ohio J Sci 5:219-285
Testudines	Chelydridae	Macrochelys	temminckii		Macrochelys_temminckii	1	unknown	Mass	1848		1.01		Adult	Macroclem temminckii	Crile G and Quiring DP (1940) Ohio J Sci 5:219-285
Testudines	Emydidae	Clemmys	guttata		Clemmys_guttata	1	m	Mass	2163		1.36		Adult		Crile G and Quiring DP (1940) Ohio J Sci 5:219-285
Testudines	Emydidae	Emys	orbicularis		Emys_orbicularis	30	both	Mass	250		0.25		Adult		Crile G and Quiring DP (1940) Ohio J Sci 5:219-285
Testudines	Testudinidae	Testudo	graeca		Testudo_graeca	30	both	Mass	320		0.3		Adult		Crile G and Quiring DP (1940) Ohio J Sci 5:219-285
Testudines	Testudinidae	Testudo	graeca		Testudo_graeca	1	unknown	Mass	993.58		0.36		unknown		Dubois E (1913) On the relation between the quantity of brain and the size of the body in vertebrates
Testudines	Testudinidae	Testudo	graeca		Testudo_graeca	1	unknown	Mass	267.5		0.318		Adult		Platel R (1979) in Biology of the Reptilia Vol. 9 pp. 147-171
Testudines	Testudinidae	Testudo	hermanni		Testudo_hermanni	1	unknown	Mass	693.4		0.476		Adult		Platel R (1979) in Biology of the Reptilia Vol. 9 pp. 147-171
Testudines	Trionychidae	Apalone	ferox		Apalone_ferox	1	unknown	Mass	3253		2.5		Adult	Trionyx ferox	Crile G and Quiring DP (1940) Ohio J Sci 5:219-285
Testudinidae	Emydidae	Trachemys	scripta		Trachemys_scripta	1	unknown	Mass	1418		0.738		Adult	Psudemys scripta	Quay WB (1972) Copeia 3:541-546
